# Supplementary material for: Inhibition of STEP61 ameliorates deficits in mouse and hiPSC-based schizophrenia models
Source: PubMed Central journal article supplement — Mol Psychiatry. 2016 Oct 18;23(2):271–81. doi: 10.1038/mp.2016.163 (PMC5395367; doi:10.1038/mp.2016.163), 2016-10-18
Supplement: NIHMS810267-supplement-2.pdf [file NIHMS810267-supplement-2.pdf]

SI Table 1. Description of known clinical information for the four SZ patient and six controls of cohort 1 (SZ1).

| Cohort | ID | SOURCE  | Patient ID | Source Cell | Reprogramming method | Sex | Dx      | Ethnicity                       | Age at Biopsy | Age of Onset | IQ      | Developmental History | Clozapine Response | Family History | SZ CNV Burden |
|--------|----|---------|------------|-------------|----------------------|-----|---------|---------------------------------|---------------|--------------|---------|-----------------------|--------------------|----------------|---------------|
| SZ1    | C1 | ATCC    | BJ         | Fibroblast  | LV-TRE-KOSML         | M   | Control | Causasian                       | 0             | n/a          | unknown | unknown               | unknown            | unknown        | -             |
| SZ1    | C2 | Coriell | GM03440    | Fibroblast  | LV-TRE-KOSML         | M   | Control | Causasian                       | 20            | n/a          | unknown | unknown               | unknown            | unknown        | -             |
| SZ1    | C3 | Coriell | GM03651    | Fibroblast  | LV-TRE-KOSML         | F   | Control | Causasian                       | 25            | n/a          | unknown | unknown               | unknown            | unknown        | -             |
| SZ1    | C4 | Coriell | GM04506    | Fibroblast  | LV-TRE-KOSML         | F   | Control | Causasian                       | 20            | n/a          | unknown | unknown               | unknown            | unknown        | -             |
| SZ1    | C5 | Coriell | AG09319    | Fibroblast  | LV-TRE-KOSML         | F   | Control | Causasian                       | 24            | n/a          | unknown | unknown               | unknown            | unknown        | -             |
| SZ1    | C6 | Coriell | AG09429    | Fibroblast  | LV-TRE-KOSML         | F   | Control | Causasian                       | 25            | n/a          | unknown | unknown               | unknown            | unknown        | -             |
| SZ1    | P1 | Coriell | GM02038    | Fibroblast  | LV-TRE-KOSML         | M   | COS     | Causasian                       | 22            | 6            | unknown | unknown               | unknown            | unknown        | -             |
| SZ1    | P2 | Coriell | GM01792    | Fibroblast  | LV-TRE-KOSML         | M   | SZ      | Causasian Jewish / Scandanavian | 26            | unknown      | unknown | unknown               | unknown            | SZ/SA          | -             |
| SZ1    | P3 | Coriell | GM01835    | Fibroblast  | LV-TRE-KOSML         | F   | SA      | Causasian Jewish                | 27            | unknown      | unknown | unknown               | unknown            | SZ             | -             |
| SZ1    | P4 | Coriell | GM02497    | Fibroblast  | LV-TRE-KOSML         | M   | SZ      | Causasian Jewish                | 23            | 15           | unknown | unknown               | unknown            | SZ             | -             |

SI Table 2. Description of known clinical information for the nine SZ patient and eight controls of cohort 2 (SZ2).

| Cohort | ID | SOURCE   | Patient ID | Source Cell | Reprogramming method | Sex | Dx      | Ethnicity                   | Age at Biopsy | Age of Onset | IQ  | Developmental History | Clozapine Response | Family History | SZ CNV Burden |
|--------|----|----------|------------|-------------|----------------------|-----|---------|-----------------------------|---------------|--------------|-----|-----------------------|--------------------|----------------|---------------|
| SZ2    | C1 | NIMH-COS | NSB553     | Fibroblast  | SV-KOSM              | M   | Control | caucasian                   | 31            | n/a          | 127 | clean                 | n/a                | -              | -             |
| SZ2    | C2 | NIMH-COS | NSB690     | Fibroblast  | SV-KOSM              | M   | Control | White, non-Hispanic         | 25            | n/a          | 115 | clean                 | n/a                | -              | -             |
| SZ2    | C3 | NIMH-COS | NSB2607    | Fibroblast  | SV-KOSM              | M   | Control | caucasian                   | 15            | n/a          | 126 | clean                 | n/a                | -              | -             |
| SZ2    | C4 | NIMH-COS | NSB3084    | Fibroblast  | SV-KOSM              | M   | Control | Black, non-Hispanic         | 14            | n/a          | 87  | clean                 | n/a                | -              | -             |
| SZ2    | C5 | NIMH-COS | NSB3158    | Fibroblast  | SV-KOSM              | F   | Control | White, Hispanic             | 16            | n/a          | 112 | clean                 | n/a                | -              | -             |
| SZ2    | C6 | NIMH-COS | NSB3182    | Fibroblast  | SV-KOSM              | F   | Control | White, non-Hispanic         | 16            | n/a          | 119 | clean                 | n/a                | -              | -             |
| SZ2    | C7 | NIMH-COS | NSB3234    | Fibroblast  | SV-KOSM              | M   | Control | Other (Indian) non-Hispanic | 17            | n/a          | 94  | clean                 | n/a                | -              | -             |
| SZ2    | C8 | NIMH-COS | NSB3113    | Fibroblast  | SV-KOSM              | F   | Control | caucasian                   | 18            | n/a          | 123 | clean                 | n/a                | -              | -             |
| SZ2    | P1 | NIMH-COS | NSB499     | Fibroblast  | SV-KOSM              | M   | COS     | caucasian                   | 30            | 12           | 84  | clean                 | N                  | SPD            | 3p25.3        |
| SZ2    | P2 | NIMH-COS | NSB581     | Fibroblast  | SV-KOSM              | M   | COS     | caucasian                   | 30            | 7            | 74  | MDD                   | N                  | SA             | 2p16.3 del    |
| SZ2    | P3 | NIMH-COS | NSB676     | Fibroblast  | SV-KOSM              | F   | COS     | caucasian                   | 27            | 10           | 79  | MDD                   | N                  | PPD            | 16p11.2       |
| SZ2    | P4 | NIMH-COS | NSB1442    | Fibroblast  | SV-KOSM              | M   | COS     | caucasian                   | 25            | 12           | 74  | ASD                   | N                  | ASD            | 1p33          |
| SZ2    | P5 | NIMH-COS | NSB2513    | Fibroblast  | SV-KOSM              | M   | COS     | caucasian                   | 12            | 4            | 55  | ASD                   | N                  | BD             | -             |
| SZ2    | P6 | NIMH-COS | NSB2620    | Fibroblast  | SV-KOSM              | M   | COS     | caucasian                   | 15            | 11           | 54  | clean                 | N                  | APD, SPD       | -             |
| SZ2    | P7 | NIMH-COS | NSB2011    | Fibroblast  | SV-KOSM              | F   | COS     | caucasian                   | 16            | 8            | 69  | MDD                   | Y                  | SPD; PPD       | 16p11.2       |
| SZ2    | P8 | NIMH-COS | NSB2476    | Fibroblast  | SV-KOSM              | F   | COS     | caucasian-hispanic          | 15            | 8            | 82  | clean                 | Y                  | APD            | -             |
| SZ2    | P9 | NIMH-COS | NSB2962    | Fibroblast  | SV-KOSM              | M   | COS     | caucasian-hispanic          | 8             | 8            | 78  | clean                 | Y                  | SZ/ASD         | -             |

SI Table 3. STEP<sub>61</sub> levels in SZ patient hiPSC neurons.

| Patient ID | Cohort  | STEP <sub>61</sub> level<br>(Mean) | STEP <sub>61</sub> level<br>(SEM) | P value<br>(compared to<br>control<br>neurons) |
|------------|---------|------------------------------------|-----------------------------------|------------------------------------------------|
| GM02038    | SZ1-FB  | 2.51                               | 0.30                              | <b>0.004</b>                                   |
| GM01792    | SZ1-FB  | 1.78                               | 0.33                              | <b>0.048</b>                                   |
| GM01835    | SZ1-FB  | 2.05                               | 0.26                              | <b>0.009</b>                                   |
| GM02497    | SZ1-FB  | 0.98                               | 0.06                              | 0.778                                          |
| NSB499     | SZ2-FB  | 1.82                               | 0.33                              | 0.133                                          |
| NSB581     | SZ2-FB  | 1.88                               | 0.09                              | <b>0.011</b>                                   |
| NSB676     | SZ2-FB  | 1.31                               | 0.32                              | 0.438                                          |
| NSB1442    | SZ2-FB  | 1.71                               | 0.34                              | 0.175                                          |
| NSB2513    | SZ2-FB  | 2.13                               | 0.19                              | <b>0.027</b>                                   |
| NSB2620    | SZ2-FB  | 1.24                               | 0.05                              | <b>0.036</b>                                   |
| NSB2011    | SZ2-FB  | 0.40                               | 0.08                              | <b>0.018</b>                                   |
| NSB2476    | SZ2-FB  | 1.06                               | 0.11                              | 0.673                                          |
| NSB2962    | SZ2-FB  | 1.88                               | 0.33                              | 0.114                                          |
| NSB499     | SZ2-GLU | 1.17                               | 0.32                              | 0.614                                          |
| NSB581     | SZ2-GLU | 2.47                               | 0.50                              | <b>0.032</b>                                   |
| NSB676     | SZ2-GLU | 0.60                               | 0.02                              | <b>0.004</b>                                   |
| NSB1442    | SZ2-GLU | 2.18                               | 0.52                              | 0.073                                          |
| NSB2513    | SZ2-GLU | 3.06                               | 0.83                              | 0.132                                          |
| NSB2620    | SZ2-GLU | 0.58                               | 0.05                              | <b>0.016</b>                                   |
| NSB2011    | SZ2-GLU | 1.07                               | 0.19                              | 0.722                                          |
| NSB2476    | SZ2-GLU | 1.05                               | 0.09                              | 0.633                                          |
| NSB2962    | SZ2-GLU | 1.86                               | 0.39                              | 0.082                                          |

**SI Table 4. Antibodies used in this study.**

| <b>Antibody</b>                 | <b>Immunogen</b>                                                                  | <b>Host</b> | <b>Dilution</b> | <b>Source</b>                            |
|---------------------------------|-----------------------------------------------------------------------------------|-------------|-----------------|------------------------------------------|
| anti-STEP, clone D9H3           | Residues around Ile <sup>440</sup> of human STEP <sub>61</sub>                    | rabbit      | 1:1000          | Cell Signaling Technologies, Danvers, MA |
| anti-STEP (23E5)                | N-terminal of rat STEP <sub>46</sub>                                              | mouse       | 1:1000          | Santa Cruz Biotechnology, Santa Cruz, CA |
| anti-non-phosphorylated STEP    | Synthetic nonphosphopeptide around Ser <sup>221</sup> of human STEP <sub>61</sub> | rabbit      | 1:1000          | Cell Signaling                           |
| anti-pSTEP <sub>61</sub>        | Synthetic phosphopeptide CQERRGpSNVSL of mouse STEP <sub>61</sub>                 | rabbit      | 1:500           | Paul et al., 2003                        |
| anti-phospho-GluN2B             | Synthetic phosphopeptide around Tyr <sup>1472</sup> of rat GluN2B                 | rabbit      | 1:1000          | Millipore, Billerica, MA                 |
| anti-GluN2B                     | C-terminus (aa 1463-1482) of mouse GluN2B                                         | mouse       | 1:1000          | Millipore                                |
| anti-pERK1/2                    | Synthetic phosphopeptide around Tyr <sup>204</sup> of human ERK                   | mouse       | 1:1000          | Santa Cruz                               |
| anti-ERK2                       | C-terminus of rat ERK2                                                            | rabbit      | 1:5000          | Santa Cruz                               |
| anti-NR1                        | C-terminus (834-938) of rat NR1                                                   | mouse       | 1:1000          | Millipore                                |
| anti-GABA <sub>A</sub> receptor | Extracellular domain of b2/3                                                      | mouse       | 1:1000          | Millipore                                |
| anti-ubiquitin                  | Ubiquitin purified from bovine red blood cells                                    | rabbit      | 1:5000          | Thermo Scientific, Fremont, CA           |
| anti-UBA1a                      | Synthetic peptide corresponding to the N- terminus of human UBE1                  | rabbit      | 1:1000          | Cell Signaling                           |
| anti-UBA6                       | Synthetic peptide around Lys <sup>810</sup> of human UBE1L2                       | rabbit      | 1:1000          | Cell Signaling                           |
| anti-UBE2L3                     | Synthetic peptide around Leu <sup>125</sup> of human UBE2L3                       | rabbit      | 1:1000          | Cell Signaling                           |
| anti-UBE2N                      | Synthetic peptide corresponding to C- terminus of human UBE2N                     | rabbit      | 1:1000          | Cell Signaling                           |
| anti-Parkin                     | C-terminus of the human Parkin                                                    | mouse       | 1:1000          | Cell Signaling                           |
| anti-b-actin                    | gizzard actin of avian origin                                                     | mouse       | 1:5000          | Santa Cruz                               |
| anti-rabbit IgG                 | rabbit IgG (H+L), Peroxidase Conjugated                                           | goat        | 1:5000          | Thermo Scientific                        |
| anti-mouse IgG                  | mouse IgG (H+L), Peroxidase Conjugated                                            | goat        | 1:5000          | Thermo Scientific                        |

**SI Table 5. RT-PCR primers used in this study**

| <b>Gene</b>                    | <b>Primer Sequence (5'-3')</b>                                         |
|--------------------------------|------------------------------------------------------------------------|
| Human <i>STEP<sub>61</sub></i> | Forward: AATGAATTATGAGGGAGCCAGG<br>Reverse: CTCAGCCTCGTCCAGTG          |
| Mouse <i>STEP<sub>61</sub></i> | Forward: GGTGAAATGTCAGGAACAAGC<br>Reverse: GTGCTTCCATCTCTACCGG         |
| Human <i>GAPDH</i>             | Forward: GGTGGTCTCCTCTGACTTCAACA<br>Reverse: GTTGCTGTAGCCAAATTCGTTGT   |
| Mouse <i>GAPDH</i>             | Forward: TCCATGACAACCTTGGCATTGTGG<br>Reverse: GTTGCTGTTGAAGTCGCAGGAGAC |
| Human <i>GRIN2A</i>            | Forward: CGCTGTCATATTCCTGGCTAG<br>Reverse: GCACTGTCCCAAATCGAAAAG       |
| Human <i>GRIN2B</i>            | Forward: TGGCCCTCAGCCTCATCACC<br>Reverse: CATCACGGATTGGCGCTCCT         |
| Human <i>NANOG</i>             | Forward: CAGTCTGGACACTGGCTGAA<br>Reverse: CTCGCTGATTAGGCTCCAAC         |
| Human <i>OCT4</i>              | Forward: TGTA CTCTCGGTCCCTTTC<br>Reverse: TCCAGGTTTTCTTCCCTAGC         |
| Human <i>cMYC</i>              | Forward: CGGAACTCTTGTGCGTAAGG<br>Reverse: CTCAGCCAAGTTGTGAGGT          |
| Human <i>LIN28</i>             | Forward: CCTTTGCCTTCGGACTTCTC<br>Reverse: TGAACCACTTACAGATGCCC         |
| Human <i>GAPDH</i>             | Forward: AGGGCTGCTTTTAACTCTGGT<br>Reverse: CCCCACTTGATTTTGGAGGGA       |
| Human $\beta$ - <i>ACTIN</i>   | Forward: TGTCCCCAACTTGAGATGT<br>Reverse: TGTGCACTTTTATTCAACTGGTC       |

SI Table 6. Comparison of levels of STEP<sub>61</sub> and phosphorylation of its substrates in mouse and iPSC-based SZ models

|                                        | Basal levels                                                                                    |              | Genetic reduction of STEP <sub>61</sub>                            |        | Neuroleptics treatment                                             |        | STEP inhibitor treatment                                           |        | Disruption of UPS                                                                                                                    |        | NRG1b treatment                                                                                               |          |
|----------------------------------------|-------------------------------------------------------------------------------------------------|--------------|--------------------------------------------------------------------|--------|--------------------------------------------------------------------|--------|--------------------------------------------------------------------|--------|--------------------------------------------------------------------------------------------------------------------------------------|--------|---------------------------------------------------------------------------------------------------------------|----------|
|                                        | Results                                                                                         | Figure       | Results                                                            | Figure | Results                                                            | Figure | Results                                                            | Figure | Results                                                                                                                              | Figure | Results                                                                                                       | Figure   |
| <b>Nrg1<sup>-/-</sup> mouse brains</b> | ↑ tSTEP <sub>61</sub> ↓ pGluN2B<br>↓ pSTEP <sub>61</sub> ↓ pERK1/2<br>= STEP <sub>61</sub> mRNA | 1a<br>SI 14c | ↓ tSTEP <sub>61</sub> ↑ pGluN2B<br>↓ pSTEP <sub>61</sub> ↑ pERK1/2 | 1e     | = tSTEP <sub>61</sub> ↑ pGluN2B<br>↑ pSTEP <sub>61</sub> ↑ pERK1/2 | 2a     | = tSTEP <sub>61</sub> ↑ pGluN2B<br>= pSTEP <sub>61</sub> ↑ pERK1/2 | 2c     | ↓ Ub-STEP 5d<br>= total Ub proteins SI 15b<br>↑ UBE2N SI 15d<br>= UBA6 SI 15f<br>= UBA1 SI 15h<br>= UBE2L3 SI 15j<br>= Parkin SI 15i | 5d     | ↓ tSTEP <sub>61</sub> ↑ pGluN2B<br>↑ pSTEP <sub>61</sub> ↑ pERK1/2<br>↑ Ub-STEP (in rat cortical cultures) 5i | 5g<br>5i |
| <b>ErbB2/4 CNS KO mouse brains</b>     | ↑ tSTEP <sub>61</sub> ↓ pGluN2B<br>↓ pSTEP <sub>61</sub> ↓ pERK1/2                              | SI 1b        | N.D.                                                               |        | N.D.                                                               |        | N.D.                                                               |        | N.D.                                                                                                                                 |        | N.D.                                                                                                          |          |
| <b>SZ1 FB neurons</b>                  | ↑ tSTEP <sub>61</sub> ↓ pGluN2B<br>↑ aSTEP <sub>61</sub> ↓ pERK1/2<br>= STEP <sub>61</sub> mRNA | 1b<br>SI 14a | ↓ tSTEP <sub>61</sub> ↑ pGluN2B<br>↓ pSTEP <sub>61</sub> ↑ pERK1/2 | 1f     | = tSTEP <sub>61</sub> ↑ pGluN2B<br>↑ pSTEP <sub>61</sub> ↑ pERK1/2 | 2b     | = tSTEP <sub>61</sub> ↑ pGluN2B<br>= aSTEP <sub>61</sub> ↑ pERK1/2 | 2d     | ↓ Ub-STEP 5a<br>↓ total Ub proteins SI 15a<br>↑ UBE2N SI 15c<br>↓ UBA6 SI 15e<br>= UBA1 SI 15g<br>= UBE2L3 SI 15i<br>= Parkin SI 15k | 5a     | ↓ tSTEP <sub>61</sub> ↑ pGluN2B<br>↑ pSTEP <sub>61</sub> ↑ pERK1/2<br>↑ Ub-STEP 5j                            | 5h<br>5j |
| <b>SZ2 FB neurons</b>                  | ↑ tSTEP <sub>61</sub> ↓ pGluN2B<br>↑ aSTEP <sub>61</sub> ↓ pERK1/2                              | 1c           | N.D.                                                               |        | N.D.                                                               |        | N.D.                                                               |        | ↓ Ub-STEP 5b                                                                                                                         | 5b     | N.D.                                                                                                          |          |
| <b>SZ2 GLU neurons</b>                 | ↑ tSTEP <sub>61</sub> ↓ pGluN2B<br>↑ aSTEP <sub>61</sub> ↓ pERK1/2                              | 1d           | N.D.                                                               |        | N.D.                                                               |        | N.D.                                                               |        | ↓ Ub-STEP 5c                                                                                                                         | 5c     | N.D.                                                                                                          |          |

Notes: ↑ increased. ↓ Decreased. = No change. N.D. not determined. Highlighted: discrepancy between the mouse and human iPSC neurons data.
